# Supplementary material
Source: PubMed Central journal article supplement (PMC4631625)
Supplement: NIHMS726940-supplement-125_2015_3750_MOESM1_ESM.pdf [file NIHMS726940-supplement-125_2015_3750_MOESM1_ESM.pdf]

**Supplemental Table 1** Detectable gene-diet interaction effect sizes at a statistical power of 80%

|                                      | <i>DHCR7</i> rs12785878 |                               | <i>CYP2R1</i> rs10741657 |                               | <i>GC</i> rs2282679 |                               |
|--------------------------------------|-------------------------|-------------------------------|--------------------------|-------------------------------|---------------------|-------------------------------|
|                                      | <i>P</i> <0.05          | <i>P</i> <0.0028 <sup>a</sup> | <i>P</i> <0.05           | <i>P</i> <0.0028 <sup>a</sup> | <i>P</i> <0.05      | <i>P</i> <0.0028 <sup>a</sup> |
| <b>Change in body weight, kg</b>     |                         |                               |                          |                               |                     |                               |
| 6 months                             | 1.87                    | 2.55                          | 1.83                     | 2.49                          | 2.04                | 2.78                          |
| 2 years                              | 2.58                    | 3.53                          | 2.52                     | 3.44                          | 2.82                | 3.85                          |
| <b>Change in glucose, moml/l</b>     |                         |                               |                          |                               |                     |                               |
| 6 months                             | 0.17                    | 0.22                          | 0.16                     | 0.22                          | 0.18                | 0.25                          |
| 2 years                              | 0.19                    | 0.25                          | 0.18                     | 0.25                          | 0.20                | 0.28                          |
| <b>Change in log-insulin, pmol/l</b> |                         |                               |                          |                               |                     |                               |
| 6 months                             | 0.16                    | 0.22                          | 0.16                     | 0.21                          | 0.18                | 0.23                          |
| 2 years                              | 0.17                    | 0.24                          | 0.17                     | 0.23                          | 0.19                | 0.25                          |
| <b>Change in log-HOMA-IR</b>         |                         |                               |                          |                               |                     |                               |
| 6 months                             | 0.18                    | 0.24                          | 0.17                     | 0.23                          | 0.19                | 0.25                          |
| 2 years                              | 0.19                    | 0.26                          | 0.18                     | 0.25                          | 0.21                | 0.27                          |

<sup>a</sup>Bonferroni's adjustment to adjust *P*-values for 18 independent tests.
