# Supplementary material
Source: PubMed Central journal article supplement (PMC4631625)
Supplement: NIHMS726940-supplement-125_2015_3750_MOESM2_ESM.pdf [file NIHMS726940-supplement-125_2015_3750_MOESM2_ESM.pdf]

**Supplemental Table 2** Weight loss according to dietary groups during interventions<sup>a</sup>

|                        | All        | Diet groups varying in protein |            |                       | Diet groups varying in fat |            |                       |
|------------------------|------------|--------------------------------|------------|-----------------------|----------------------------|------------|-----------------------|
|                        |            | Low                            | High       | <i>P</i> <sup>b</sup> | Low                        | High       | <i>P</i> <sup>b</sup> |
| <b>Weight loss, kg</b> |            |                                |            |                       |                            |            |                       |
| 6 month                | -6.5 ± 5.7 | -6.5 ± 5.7                     | -6.6 ± 5.5 | 0.71                  | -6.7 ± 5.7                 | -6.4 ± 5.7 | 0.52                  |
| 2 years                | -4.0 ± 7.4 | -3.6 ± 7.7                     | -4.5 ± 7.1 | 0.11                  | -4.1 ± 7.5                 | -3.9 ± 7.3 | 0.76                  |

<sup>a</sup>Data are mean ± SD.

<sup>b</sup>T-test was applied to test the difference between dietary groups.
