# Supplementary material
Source: PubMed Central journal article supplement (PMC4631625)
Supplement: NIHMS726940-supplement-125_2015_3750_MOESM3_ESM.pdf [file NIHMS726940-supplement-125_2015_3750_MOESM3_ESM.pdf]

**Supplemental Table 3** Energy and nutrient intakes from food records according to diet groups and genotypes<sup>a</sup>

|                                                 | All                     |                         | <i>DHCR7</i> rs12785878 |                         |                         |                         |                         |                             | <i>CYP2R1</i> rs10741657 |                            |                         |                          |                         |                              | <i>GC</i> rs2282679     |                         |                         |                         |                         |                         |
|-------------------------------------------------|-------------------------|-------------------------|-------------------------|-------------------------|-------------------------|-------------------------|-------------------------|-----------------------------|--------------------------|----------------------------|-------------------------|--------------------------|-------------------------|------------------------------|-------------------------|-------------------------|-------------------------|-------------------------|-------------------------|-------------------------|
|                                                 |                         |                         | TT                      |                         | TG                      |                         | GG                      |                             | GG                       |                            | GA                      |                          | AA                      |                              | AA                      |                         | AC                      |                         | CC                      |                         |
|                                                 | Low                     | High                    | Low                     | High                    | Low                     | High                    | Low                     | High                        | Low                      | High                       | Low                     | High                     | Low                     | High                         | Low                     | High                    | Low                     | High                    | Low                     | High                    |
| <b>Low-fat vs. High-fat diet groups</b>         |                         |                         |                         |                         |                         |                         |                         |                             |                          |                            |                         |                          |                         |                              |                         |                         |                         |                         |                         |                         |
| <b>Total energy (kcal/d)</b>                    |                         |                         |                         |                         |                         |                         |                         |                             |                          |                            |                         |                          |                         |                              |                         |                         |                         |                         |                         |                         |
| Baseline                                        | 1937.2<br>9 ±<br>541.19 | 1995.9<br>6 ±<br>597.01 | 1998.3<br>±<br>550.86   | 1958.8<br>±<br>538.24   | 1927.7<br>±<br>492.58   | 2033.1<br>9 ±<br>594.1  | 1879.4<br>9 ±<br>670.61 | 1924.0<br>4 ±<br>732.39     | 1888.6<br>6 ±<br>536.87  | 1974.2<br>2 ±<br>598.41    | 2004.8<br>±<br>537.06   | 1987.3<br>3 ±<br>547.96  | 2003.9<br>7 ±<br>541.63 | 2021.1<br>5 ±<br>661.21      | 1929.9<br>9 ±<br>578.66 | 2005.2<br>4 ±<br>604.43 | 1948.5<br>5 ±<br>479.14 | 1954.4<br>3 ±<br>586.13 | 2116.9<br>2 ±<br>467.1  | 1980.4<br>4 ±<br>360.02 |
| 6 month                                         | 1604.7<br>9 ±<br>526.4  | 1616.1<br>4 ±<br>489.91 | 1648.5<br>1 ±<br>621.56 | 1633.9<br>6 ±<br>508.8  | 1528.1<br>9 ±<br>408.17 | 1644.5<br>9 ±<br>482.56 | 1695.0<br>1 ±<br>561.49 | 1617.5<br>1 ±<br>555.42     | 1583.2<br>7 ±<br>439.89  | 1595.8<br>3 ±<br>553.63    | 1692.0<br>8 ±<br>611.65 | 1666.9<br>7 ±<br>444.52  | 1344.6<br>9 ±<br>369.03 | 1664.8<br>6 ±<br>549.01<br>* | 1625.3<br>2 ±<br>609.01 | 1624.9<br>8 ±<br>491.9  | 1571.3<br>4 ±<br>447.81 | 1675.9<br>5 ±<br>530.76 | 1709.9<br>8 ±<br>369.13 | 1520.0<br>2 ±<br>424.3  |
| 2 years                                         | 1545.3<br>2 ±<br>468.91 | 1469.7<br>5 ±<br>483.74 | 1575.1<br>7 ±<br>474.97 | 1495.3<br>3 ±<br>389.32 | 1514.2<br>2 ±<br>418.32 | 1535.3<br>7 ±<br>663.03 | 1929.7<br>4 ±<br>658.41 | 1239.8<br>4 ±<br>200.2<br>* | 1567.7<br>3 ±<br>446.97  | 1263.9<br>±<br>271.92<br>* | 1637.1<br>5 ±<br>459.18 | 1647.2<br>5 ±<br>587.67  | 1343.1<br>9 ±<br>564.77 | 1375.5<br>4 ±<br>374.32      | 1569.5<br>3 ±<br>473.54 | 1410.1<br>1 ±<br>507.77 | 1447.2<br>1 ±<br>415.55 | 1558.4<br>3 ±<br>490.19 | 1790.1<br>2 ±<br>527.16 | 1435.7<br>9 ±<br>437.23 |
| <b>Fat (% of energy)</b>                        |                         |                         |                         |                         |                         |                         |                         |                             |                          |                            |                         |                          |                         |                              |                         |                         |                         |                         |                         |                         |
| Baseline                                        | 36.71<br>± 6.18         | 37.17<br>± 5.71         | 36.89<br>± 6.2          | 37.36<br>± 5.36         | 36.62<br>± 6.2          | 37.01<br>± 6.48         | 35.86<br>± 6.69         | 37.65<br>± 5.66             | 37.46<br>± 6.46          | 37.15<br>± 5.57            | 36.2 ±<br>6.42          | 37.32<br>± 5.58          | 36.44<br>± 4.04         | 37.29<br>± 7.15              | 36.18<br>± 6.5          | 37.07<br>± 5.44         | 37.1 ±<br>6.1           | 37.47<br>± 6.65         | 37.9 ±<br>5.47          | 36.97<br>± 3.09         |
| 6 month                                         | 26.05<br>± 7.45         | 34.08<br>± 7.26<br>*    | 25.17<br>± 7.08         | 33.99<br>± 6.93<br>*    | 27.19<br>± 8.16         | 34.12<br>± 7.22<br>*    | 26.4 ±<br>6.12          | 33.78<br>± 8.1 *            | 25.67<br>± 7.35          | 34.06<br>± 6.17<br>*       | 27.08<br>± 7.38         | 34.7 ±<br>7.93 *         | 22.97<br>± 7.59         | 33.11<br>± 6.83<br>*         | 26.06<br>± 7.88         | 33.41<br>± 6.92<br>*    | 26.52<br>± 6.75         | 35.44<br>± 7.08<br>*    | 25.67<br>± 7.05         | 32.38<br>± 7.29<br>*    |
| 2 years                                         | 27.45<br>± 8.05         | 34.16<br>± 7.64<br>*    | 26.19<br>± 7.75         | 35.93<br>± 6.57<br>*    | 28.67<br>± 7.96         | 32.92<br>± 6.88<br>*    | 29.48<br>± 8.96         | 30.33<br>±<br>12.96         | 29.15<br>± 9.27          | 33.06<br>± 8.83            | 26.85<br>± 7.41         | 34.69<br>± 7.73<br>*     | 26.02<br>± 6.6          | 35.59<br>± 5.63<br>*         | 26.67<br>± 7.02         | 33.77<br>± 6.86<br>*    | 27.02<br>± 7.87         | 35.03<br>± 8.79<br>*    | 31.25<br>±<br>10.59     | 33.82<br>± 7.43         |
| <b>Carbohydrate (% of energy)</b>               |                         |                         |                         |                         |                         |                         |                         |                             |                          |                            |                         |                          |                         |                              |                         |                         |                         |                         |                         |                         |
| Baseline                                        | 45.28<br>± 7.67         | 44.37<br>± 7.45         | 44.77<br>± 8.03         | 43.3 ±<br>7.1           | 45.12<br>± 7.72         | 45.15<br>± 8.08         | 47.27<br>± 7.22         | 43.53<br>± 7.54             | 44.38<br>± 8.25          | 44.31<br>± 7.36            | 45.55<br>± 7.79         | 43.88<br>± 7.31          | 47.06<br>± 6.44         | 44.37<br>± 8.68              | 45.55<br>± 7.97         | 44.56<br>± 7.43         | 45.55<br>± 7.67         | 43.76<br>± 7.64         | 43 ±<br>7.63            | 42.8 ±<br>7.16          |
| 6 month                                         | 55.5 ±<br>10.12         | 45.99<br>± 8.23<br>*    | 56.1 ±<br>9.51          | 45.21<br>± 7.92<br>*    | 54.33<br>±<br>11.59     | 47.02<br>± 8.94<br>*    | 54.71<br>± 8.41         | 46.6 ±<br>7.94 *            | 56.28<br>±<br>10.61      | 45.82<br>± 7.25<br>*       | 53.71<br>± 9.83         | 45.04<br>± 8.9 *         | 59.56<br>± 10.35        | 48.96<br>± 8.66<br>*         | 55 ±<br>10.64           | 47.15<br>± 8.31<br>*    | 54.52<br>± 9.38         | 45.07<br>± 8.25<br>*    | 57.88<br>± 9.69         | 42.61<br>± 7.07<br>*    |
| 2 years                                         | 52.25<br>±<br>10.13     | 45.88<br>± 9.62<br>*    | 52.94<br>±<br>10.54     | 44.24<br>± 8.48<br>*    | 51.25<br>±<br>10.06     | 46.63<br>± 8.89         | 52.29<br>± 7.96         | 51.39<br>± 16.4             | 50.73<br>±<br>10.22      | 48.23<br>±<br>10.03        | 52.42<br>± 9.92         | 45.08<br>±<br>10.74<br>* | 54.84<br>±<br>10.85     | 43.41<br>± 6.39<br>*         | 52.8 ±<br>10.56         | 46.02<br>± 9.36<br>*    | 53.25<br>± 8.05         | 45.78<br>± 10.7<br>*    | 48.29<br>±<br>11.35     | 45.43<br>± 9.83         |
| <b>Protein (% of energy)</b>                    |                         |                         |                         |                         |                         |                         |                         |                             |                          |                            |                         |                          |                         |                              |                         |                         |                         |                         |                         |                         |
| Baseline                                        | 18.03<br>± 3.54         | 18.09<br>± 3.14         | 18.04<br>± 3.87         | 18.07<br>± 3.12         | 18.39<br>± 3.31         | 18.24<br>± 3.6          | 17.32<br>± 3.35         | 18.86<br>± 2.19             | 18.01<br>± 3.7           | 18.48<br>± 2.7             | 18.21<br>± 3.44         | 17.88<br>± 3.61          | 16.98<br>± 2.85         | 18.03<br>± 3.04              | 18.11<br>± 3.47         | 18.34<br>± 2.99         | 17.98<br>± 3.44         | 18.01<br>± 3.22         | 17.95<br>± 3.9          | 17.81<br>± 4.63         |
| 6 month                                         | 19.62<br>± 4.13         | 20.52<br>± 4.89         | 19.55<br>± 3.88         | 21.03<br>± 4.94<br>*    | 19.84<br>± 4.54         | 19.96<br>± 4.75         | 20.43<br>± 3.87         | 19.72<br>± 5.61             | 19.69<br>± 4.38          | 21 ±<br>5.04               | 19.66<br>± 4.13         | 20.07<br>± 4.27          | 20.31<br>± 3.39         | 19.76<br>± 5.96              | 19.73<br>± 3.73         | 20.25<br>± 4.98         | 20.35<br>± 4.75         | 19.94<br>± 4.53         | 18.54<br>± 3            | 24.28<br>± 5.41<br>*    |
| 2 years                                         | 20.16<br>± 4.01         | 20.36<br>± 5.24         | 20.4 ±<br>4.04          | 19.75<br>± 4.59         | 19.69<br>± 3.76         | 21.83<br>± 6.07         | 19.86<br>± 4.17         | 17.83<br>± 4.08             | 20.7 ±<br>3.67           | 19.84<br>± 5.44            | 19.9 ±<br>4.08          | 20.17<br>± 4.8           | 18.8 ±<br>3.84          | 21.52<br>± 6.18              | 20.02<br>± 4.05         | 20.79<br>± 5.54         | 20.09<br>± 4.19         | 19.72<br>± 5.21         | 19.88<br>± 3.12         | 19.96<br>± 3.33         |
| <b>Low-protein vs. High-protein diet groups</b> |                         |                         |                         |                         |                         |                         |                         |                             |                          |                            |                         |                          |                         |                              |                         |                         |                         |                         |                         |                         |
| <b>Total energy (kcal/d)</b>                    |                         |                         |                         |                         |                         |                         |                         |                             |                          |                            |                         |                          |                         |                              |                         |                         |                         |                         |                         |                         |

|                                   |                         |                         |                         |                         |                         |                         |                         |                              |                         |                         |                         |                              |                         |                         |                         |                         |                         |                         |                         |                         |
|-----------------------------------|-------------------------|-------------------------|-------------------------|-------------------------|-------------------------|-------------------------|-------------------------|------------------------------|-------------------------|-------------------------|-------------------------|------------------------------|-------------------------|-------------------------|-------------------------|-------------------------|-------------------------|-------------------------|-------------------------|-------------------------|
| Baseline                          | 2013.8<br>7 ±<br>552.38 | 1919.1<br>±<br>584.04   | 1984.0<br>8 ±<br>546.22 | 1971.7<br>1 ±<br>543.15 | 1995.0<br>8 ±<br>541.56 | 1958.7<br>±<br>548.32   | 2157.4<br>4 ±<br>613.7  | 1581.0<br>6 ±<br>666.89<br>* | 1895.3<br>4 ±<br>520.81 | 1969.1<br>7 ±<br>612.83 | 2131.9<br>9 ±<br>539.79 | 1868.9<br>5 ±<br>512.07<br>* | 1939.5<br>1 ±<br>623.36 | 2149.7<br>8 ±<br>585.78 | 1997.0<br>9 ±<br>572.04 | 1935.0<br>1 ±<br>612.4  | 2002.5<br>7 ±<br>561.02 | 1907.6<br>2 ±<br>518.42 | 2088.0<br>4 ±<br>441.54 | 2037.1<br>4 ±<br>427.86 |
| 6 month                           | 1621.9<br>9 ±<br>490.13 | 1598.8<br>1 ±<br>526.4  | 1617.6<br>6 ±<br>493.09 | 1661.2<br>2 ±<br>621.64 | 1610.2<br>1 ±<br>482.88 | 1550.1<br>3 ±<br>404.35 | 1776.6<br>3 ±<br>568.4  | 1449.5<br>8 ±<br>472.82      | 1643.7<br>9 ±<br>527.29 | 1543.6<br>6 ±<br>474.25 | 1672.8<br>1 ±<br>479.85 | 1688.7<br>±<br>599.48        | 1534.6<br>2 ±<br>512.65 | 1531.7<br>2 ±<br>506.84 | 1591.7<br>9 ±<br>497.48 | 1663.4<br>7 ±<br>614.71 | 1704.9<br>7 ±<br>526.97 | 1565.0<br>3 ±<br>462.17 | 1735.0<br>8 ±<br>353.65 | 1520.2<br>5 ±<br>423.36 |
| 2 years                           | 1526.4<br>8 ±<br>501.95 | 1490.9<br>8 ±<br>448.88 | 1500.5<br>8 ±<br>406.85 | 1568.0<br>1 ±<br>459.09 | 1570.7<br>9 ±<br>594.02 | 1470.8<br>5 ±<br>453.03 | 1669.2<br>7 ±<br>667.67 | 1377.6<br>1 ±<br>386.11      | 1353.8<br>5 ±<br>324.84 | 1474.6<br>±<br>446.9    | 1718.7<br>9 ±<br>569.9  | 1557.2<br>±<br>449.79        | 1342.2<br>2 ±<br>435.18 | 1410.5<br>3 ±<br>563.35 | 1471.6<br>4 ±<br>490.07 | 1531.5<br>7 ±<br>499.91 | 1625.6<br>3 ±<br>511.2  | 1419.5<br>5 ±<br>398.51 | 1613.5<br>5 ±<br>628.25 | 1749.9<br>6 ±<br>336.91 |
| <b>Fat (% of energy)</b>          |                         |                         |                         |                         |                         |                         |                         |                              |                         |                         |                         |                              |                         |                         |                         |                         |                         |                         |                         |                         |
| Baseline                          | 37.08<br>± 5.93         | 36.79<br>± 5.98         | 37.93<br>± 5.81         | 36.39<br>± 5.65         | 36.07<br>± 6.2          | 37.57<br>± 6.38         | 37.33<br>± 5.67         | 35.98<br>± 6.9               | 37.44<br>± 6.04         | 37.17<br>± 5.97         | 36.91<br>± 5.77         | 36.52<br>± 6.36              | 37.23<br>± 6.73         | 36.49<br>± 4.97         | 36.87<br>± 5.92         | 36.35<br>± 6.11         | 37.14<br>± 6.42         | 37.45<br>± 6.4          | 38.19<br>± 5.12         | 36.71<br>± 4.09         |
| 6 month                           | 29.92<br>± 8.34         | 30.12<br>± 8.43         | 29.13<br>± 8.01         | 30.26<br>± 8.49         | 30.13<br>± 9.15         | 30.5 ±<br>7.75          | 31.46<br>± 7.74         | 28.04<br>± 8.36              | 29.46<br>± 8.05         | 30.45<br>± 7.88         | 30.83<br>± 8.58         | 30.26<br>± 8.48              | 28.85<br>± 8.72         | 29.12<br>± 8.92         | 29.5 ±<br>8.42          | 29.64<br>± 8.17         | 31.17<br>± 8.55         | 31.5 ±<br>7.99          | 29.74<br>± 7.04         | 27.41<br>± 8.57         |
| 2 years                           | 29.76<br>± 8.71         | 31.59<br>± 8.27         | 30.44<br>± 9.14         | 31.91<br>± 8.18         | 29.26<br>± 7.41         | 31.75<br>± 8.06         | 30.31<br>±<br>12.04     | 29.51<br>±<br>10.54          | 30.14<br>± 9.7          | 31.62<br>± 8.91         | 28.95<br>± 8.47         | 32.18<br>± 8.27              | 32 ±<br>8.16            | 28.96<br>± 6.28         | 29.56<br>± 7.27         | 30.14<br>± 8.41         | 30.85<br>±<br>10.43     | 32.59<br>± 8.23         | 29.5 ±<br>10.62         | 35.58<br>± 6.98         |
| <b>Carbohydrate (% of energy)</b> |                         |                         |                         |                         |                         |                         |                         |                              |                         |                         |                         |                              |                         |                         |                         |                         |                         |                         |                         |                         |
| Baseline                          | 44.55<br>± 7.56         | 45.1 ±<br>7.58          | 43 ± 7                  | 44.94<br>± 7.99         | 45.79<br>± 8.26         | 44.45<br>± 7.42         | 44.31<br>± 6.87         | 46.86<br>± 8.25              | 43.57<br>± 7.59         | 45.06<br>± 7.91         | 44.72<br>± 7.49         | 44.86<br>± 7.74              | 44.74<br>± 8.5          | 46.56<br>± 6.9          | 44.69<br>± 7.77         | 45.46<br>± 7.66         | 44.71<br>± 7.37         | 44.44<br>± 7.98         | 41.03<br>± 7.09         | 45.47<br>± 7.14         |
| 6 month                           | 53.42<br>±<br>10.82     | 48.18<br>± 9.23<br>*    | 54.03<br>±<br>10.46     | 47.37<br>± 9.07<br>*    | 54.07<br>± 11.9         | 47.89<br>± 9.21<br>*    | 49.63<br>± 9.52         | 52.07<br>± 8.3               | 54.56<br>± 11.07        | 47.75<br>± 8.76<br>*    | 51.65<br>± 10.89        | 47.82<br>± 9.42<br>*         | 55.51<br>± 10.55        | 49.78<br>± 10.19        | 53.63<br>± 10.93        | 48.53<br>± 8.94<br>*    | 52.83<br>± 10.39        | 46.59<br>± 8.67<br>*    | 51.91<br>± 11.63        | 50.62<br>± 11.69        |
| 2 years                           | 50.95<br>±<br>10.71     | 47.36<br>± 9.69<br>*    | 51.1 ±<br>11.63         | 45.88<br>± 8.46<br>*    | 50.1 ±<br>8.74          | 48.47<br>± 10.9         | 51.89<br>±<br>16.11     | 51.64<br>± 8.73              | 51.95<br>± 10.25        | 47.83<br>± 9.81         | 51.29<br>± 11.15        | 46.5 ±<br>10.14<br>*         | 48.38<br>± 11.63        | 49.53<br>± 6.21         | 51.09<br>± 10.51        | 48.24<br>± 10.51        | 51.27<br>± 11.01        | 46.72<br>± 9.39         | 48.77<br>± 13.36        | 45.43<br>± 5.8          |
| <b>Protein (% of energy)</b>      |                         |                         |                         |                         |                         |                         |                         |                              |                         |                         |                         |                              |                         |                         |                         |                         |                         |                         |                         |                         |
| Baseline                          | 18.03<br>± 3.3          | 18.09<br>± 3.4          | 18.06<br>± 3.09         | 18.06<br>± 3.84         | 18.44<br>± 3.68         | 18.19<br>± 3.18         | 17.99<br>± 2.89         | 18.18<br>± 3.01              | 18.72<br>± 3.2          | 17.83<br>± 3.18         | 17.73<br>± 3.45         | 18.37<br>± 3.56              | 18.04<br>± 2.94         | 16.88<br>± 3.01         | 18.23<br>± 3.18         | 18.22<br>± 3.3          | 18.09<br>± 3.28         | 17.92<br>± 3.36         | 18.4 ±<br>4.22          | 17.23<br>± 4.02         |
| 6 month                           | 17.96<br>± 3.96         | 22.17<br>± 4.08<br>*    | 17.97<br>± 4.07         | 22.35<br>± 3.85<br>*    | 17.6 ±<br>3.62          | 22.26<br>± 4.36<br>*    | 18.81<br>± 4.17         | 22.19<br>± 5.17<br>*         | 17.7 ±<br>4.24          | 22.65<br>± 3.94<br>*    | 18.08<br>± 3.54         | 21.66<br>± 4.03<br>*         | 18.26<br>± 4.45         | 22.75<br>± 4.73<br>*    | 17.96<br>± 3.8          | 22.29<br>± 3.81<br>*    | 17.61<br>± 3.54         | 22.19<br>± 4.39<br>*    | 19.64<br>± 4.94         | 22.42<br>± 4.91         |
| 2 years                           | 19.6 ±<br>4.59          | 20.97<br>± 4.58<br>*    | 19.16<br>± 4.55         | 20.98<br>± 3.91         | 20.32<br>± 4.23         | 20.88<br>± 5.66         | 17.7 ±<br>4             | 20.03<br>± 4.17              | 18.97<br>± 4.24         | 21.24<br>± 4.62         | 19.7 ±<br>4.3           | 20.39<br>± 4.54              | 19.47<br>± 4.96         | 22.42<br>± 6.04         | 19.82<br>± 4.52         | 21.02<br>± 4.99         | 18.44<br>± 4.47         | 21.07<br>± 4.78<br>*    | 20.24<br>± 3.55         | 19.47<br>± 2.55         |

<sup>a</sup>Data are mean ± SD.

\*P<0.05 for t-tests comparison between the low and high diet groups.
