# Supplementary material
Source: PubMed Central journal article supplement (PMC4631625)
Supplement: NIHMS726940-supplement-125_2015_3750_MOESM4_ESM.pdf [file NIHMS726940-supplement-125_2015_3750_MOESM4_ESM.pdf]

**ESM Table 4** Effects of *DHCR7* rs12785878, *CYP2R1* rs10741657, and *GC* rs2282679 on changes in glucose, insulin, and HOMA-IR in response to low/high protein diets after further adjustment for weight loss

|                               | <i>DHCR7</i> rs12785878 |          |                |          | <i>CYP2R1</i> rs10741657 |          |                |          | <i>GC</i> rs2282679 |          |                |          |
|-------------------------------|-------------------------|----------|----------------|----------|--------------------------|----------|----------------|----------|---------------------|----------|----------------|----------|
|                               | 6 months                |          | 2 years        |          | 6 months                 |          | 2 years        |          | 6 months            |          | 2 years        |          |
|                               | $\beta \pm SE$          | <i>P</i> | $\beta \pm SE$ | <i>P</i> | $\beta \pm SE$           | <i>P</i> | $\beta \pm SE$ | <i>P</i> | $\beta \pm SE$      | <i>P</i> | $\beta \pm SE$ | <i>P</i> |
| Change in glucose, mmol/l     |                         |          |                |          |                          |          |                |          |                     |          |                |          |
| Low-protein                   | 0.06 ± 0.04             | 0.11     | 0.09 ± 0.04    | 0.04     | -0.01 ± 0.04             | 0.83     | 0.01 ± 0.04    | 0.77     | 0.01 ± 0.04         | 0.75     | 0.02 ± 0.05    | 0.64     |
| High-protein                  | 0.01 ± 0.04             | 0.81     | -0.02 ± 0.05   | 0.76     | -0.03 ± 0.03             | 0.39     | 0.02 ± 0.04    | 0.62     | -0.01 ± 0.04        | 0.78     | -0.01 ± 0.05   | 0.94     |
| <i>P</i> for interaction      |                         | 0.45     |                | 0.10     |                          | 0.85     |                | 0.94     |                     | 0.94     |                | 0.69     |
| Change in log-insulin, pmol/l |                         |          |                |          |                          |          |                |          |                     |          |                |          |
| Low-protein                   | 0.08 ± 0.03             | 0.02     | 0.08 ± 0.04    | 0.02     | 0.06 ± 0.03              | 0.07     | 0.02 ± 0.03    | 0.49     | 0.001 ± 0.04        | 0.84     | -0.05 ± 0.04   | 0.24     |
| High-protein                  | -0.07 ± 0.03            | 0.03     | -0.04 ± 0.03   | 0.18     | 0.01 ± 0.03              | 0.69     | 0.01 ± 0.03    | 0.84     | 0.02 ± 0.03         | 0.53     | 0.02 ± 0.03    | 0.54     |
| <i>P</i> for interaction      |                         | 0.001    |                | 0.02     |                          | 0.29     |                | 0.67     |                     | 0.59     |                | 0.12     |
| Change in log-HOMA-IR         |                         |          |                |          |                          |          |                |          |                     |          |                |          |
| Low-protein                   | 0.08 ± 0.03             | 0.02     | 0.09 ± 0.04    | 0.02     | 0.05 ± 0.03              | 0.13     | 0.02 ± 0.04    | 0.51     | 0.001 ± 0.04        | 0.85     | -0.05 ± 0.04   | 0.21     |
| High-protein                  | -0.07 ± 0.03            | 0.03     | -0.04 ± 0.04   | 0.26     | 0.01 ± 0.03              | 0.84     | 0.01 ± 0.03    | 0.78     | 0.02 ± 0.04         | 0.63     | 0.02 ± 0.04    | 0.56     |
| <i>P</i> for interaction      |                         | 0.002    |                | 0.01     |                          | 0.34     |                | 0.74     |                     | 0.69     |                | 0.11     |

Data are  $\beta \pm SE$ , representing effect size for each vitamin-D-increasing allele of *DHCR7* rs12785878 (T-allele), *CYP2R1* rs10741657 (A-allele), and *GC* rs2282679 (A-allele), respectively, on change in each trait, adjusted for age, sex ethnicity, weight loss, and the baseline value for the respective outcome trait.
