# Supplementary material
Source: PubMed Central journal article supplement (PMC4631625)
Supplement: NIHMS726940-supplement-125_2015_3750_MOESM5_ESM.pdf [file NIHMS726940-supplement-125_2015_3750_MOESM5_ESM.pdf]

**ESM Table 5** Effects of *DHCR7* rs12785878, *CYP2R1* rs10741657, and *GC* rs2282679 on changes in body weight, glucose, insulin, and HOMA-IR in response to low/high fat diets

|                               | <i>DHCR7</i> rs12785878 |          |                |          | <i>CYP2R1</i> rs10741657 |          |                |          | <i>GC</i> rs2282679 |          |                |          |
|-------------------------------|-------------------------|----------|----------------|----------|--------------------------|----------|----------------|----------|---------------------|----------|----------------|----------|
|                               | 6 months                |          | 2 years        |          | 6 months                 |          | 2 years        |          | 6 months            |          | 2 years        |          |
|                               | $\beta \pm SE$          | <i>P</i> | $\beta \pm SE$ | <i>P</i> | $\beta \pm SE$           | <i>P</i> | $\beta \pm SE$ | <i>P</i> | $\beta \pm SE$      | <i>P</i> | $\beta \pm SE$ | <i>P</i> |
| Change in body weight, kg     |                         |          |                |          |                          |          |                |          |                     |          |                |          |
| Low-fat                       | -0.85 ± 0.47            | 0.07     | -0.24 ± 0.68   | 0.72     | 0.45 ± 0.46              | 0.33     | 1.26 ± 0.65    | 0.05     | 0.19 ± 0.47         | 0.69     | -0.17 ± 0.69   | 0.81     |
| High-fat                      | -0.93 ± 0.49            | 0.06     | -1.21 ± 0.66   | 0.07     | -0.49 ± 0.43             | 0.25     | -0.79 ± 0.57   | 0.16     | 1.06 ± 0.52         | 0.04     | 1.34 ± 0.70    | 0.05     |
| <i>P</i> for interaction      |                         | 0.80     |                | 0.22     |                          | 0.22     |                | 0.02     |                     | 0.17     |                | 0.08     |
| Change in glucose, mmol/l     |                         |          |                |          |                          |          |                |          |                     |          |                |          |
| Low-fat                       | -0.01 ± 0.04            | 0.77     | 0.05 ± 0.04    | 0.18     | 0.03 ± 0.04              | 0.35     | 0.04 ± 0.04    | 0.27     | 0.03 ± 0.04         | 0.45     | 0.03 ± 0.04    | 0.45     |
| High-fat                      | 0.05 ± 0.04             | 0.19     | 0.01 ± 0.06    | 0.89     | -0.09 ± 0.04             | 0.01     | -0.02 ± 0.05   | 0.74     | -0.03 ± 0.04        | 0.43     | -0.04 ± 0.04   | 0.49     |
| <i>P</i> for interaction      |                         | 0.43     |                | 0.39     |                          | 0.004    |                | 0.32     |                     | 0.48     |                | 0.47     |
| Change in log-insulin, pmol/l |                         |          |                |          |                          |          |                |          |                     |          |                |          |
| Low-fat                       | -0.04 ± 0.04            | 0.29     | 0.01 ± 0.04    | 0.83     | 0.08 ± 0.04              | 0.04     | 0.09 ± 0.04    | 0.03     | 0.02 ± 0.04         | 0.61     | -0.03 ± 0.04   | 0.49     |
| High-fat                      | -0.03 ± 0.04            | 0.39     | -0.01 ± 0.04   | 0.90     | -0.02 ± 0.03             | 0.46     | -0.03 ± 0.04   | 0.39     | 0.06 ± 0.04         | 0.13     | 0.05 ± 0.05    | 0.30     |
| <i>P</i> for interaction      |                         | 0.29     |                | 0.48     |                          | 0.02     |                | 0.03     |                     | 0.14     |                | 0.14     |
| Change in log-HOMA-IR         |                         |          |                |          |                          |          |                |          |                     |          |                |          |
| Low-fat                       | -0.04 ± 0.04            | 0.31     | 0.02 ± 0.05    | 0.69     | 0.08 ± 0.04              | 0.04     | 0.10 ± 0.04    | 0.03     | 0.03 ± 0.04         | 0.52     | -0.03 ± 0.05   | 0.58     |
| High-fat                      | -0.02 ± 0.04            | 0.63     | -0.00 ± 0.05   | 0.93     | -0.04 ± 0.04             | 0.23     | -0.04 ± 0.04   | 0.39     | 0.05 ± 0.04         | 0.22     | 0.04 ± 0.05    | 0.47     |
| <i>P</i> for interaction      |                         | 0.42     |                | 0.41     |                          | 0.01     |                | 0.03     |                     | 0.23     |                | 0.24     |

Data are  $\beta \pm SE$ , representing effect size for each vitamin-D-increasing allele of *DHCR7* rs12785878 (T-allele), *CYP2R1* rs10741657 (A-allele), and *GC* rs2282679 (A-allele), respectively, on change in each trait, adjusted for age, sex ethnicity and the baseline value for the respective outcome trait.
